# Supplementary material for: Parthenolide Inhibits STAT3 Signaling by Covalently Targeting Janus Kinases
Source: MDPI journal article supplement (doi:10.3390/molecules23061478), 2018-06-19
Supplement: s1 [file s1]

# Parthenolide Inhibits STAT3 Signaling by Covalently Targeting Janus Kinases

*Supplementary figures*

**Man Liu** <sup>1,2</sup>, **Chengqian Xiao** <sup>3,4</sup>, **Mingwei Sun** <sup>2,5</sup>, **Minjia Tan** <sup>2,5</sup>, **Lihong Hu** <sup>3</sup> and **Qiang Yu** <sup>1,2,\*</sup>

<sup>1</sup> Shanghai Institute of Materia Medica, Chinese Academy of Sciences, Shanghai 201203, China; liuman@simm.ac.cn

<sup>2</sup> University of Chinese Academy of Sciences, Beijing 100049, China; cmusmw@163.com (M.S.); mjtan@simm.ac.cn (M.T.)

<sup>3</sup> Jiangsu Key Laboratory for Functional Substance of Chinese Medicine, Jiangsu Collaborative Innovation Center of Chinese Medicinal Resources Industrialization, State Key Laboratory Cultivation Base for TCM Quality and Efficacy, School of Pharmacy, Nanjing University of Chinese Medicine, Nanjing 210023, China; xchq890503@163.com (C.X.); lhhu@njucm.edu.cn (L.H.)

<sup>4</sup> State Key Laboratory of Drug Research, Shanghai Institute of Materia Medica, Chinese Academy of Sciences, Shanghai 201203, China

<sup>5</sup> The Chemical Proteomics Center, Shanghai Institute of Materia Medica, Chinese Academy of Sciences, Shanghai 201203, China

\* Correspondence: qyu@sibs.ac.cn; Tel.: +86-021-5080-1790

Match to: **G5E852** Score: **28851**

**Tyrosine-protein kinase OS=Mus musculus GN=Jak2 PE=1 SV=1**

Found in search of 20170112-jak2-PN.mgf

Nominal mass ( $M_r$ ): **130511**; Calculated pI value: **7.19**

NCBI BLAST search of [G5E852](#) against nr

Unformatted [sequence string](#) for pasting into other applications

Variable modifications: Acetyl (Protein N-term), Oxidation (M), Carbamidomethyl (C), PN (C)

Cleavage by Trypsin/P: cuts C-term side of KR

Sequence Coverage: **85%**

Matched peptides shown in **Bold Red**

**1** MGMACLTMTE MEATSTSPVH QNGDIPGSAN SVK**QIEPVLQ VVLYHSLGQA**  
**51** **EGEYLKFP**SG EYVAEEICVA ASKACGITPV YHNMFALMSE TERIWYPPNH  
**101** **VFHIDESTRH** DILYRIRFYF PHWYCSGSSR TYRYGVSRGA EAPLLDDFVM  
**151** **SYLFAQWRHD** FVHWIKVPV THETQEELG MAVLDMRIA KEDQTPHAV  
**201** **YNSVSYKTFL** PKCVRAKIQD YHILTRKRIR YRFRRIQQF SQCKATARNL  
**251** **KLKYLINLET** LQSAFYTEQF EVKESARGPS GEEIFATIII TGNGGIQWSR  
**301** **GKHKESETLT** EQDVQLYCDF PDIIDVSIKQ ANQECNESR ITVHKQDGK  
**351** **VLEIELSSLK** EALSFVSLID GYYRLTADAH HYLCKEVAPP AVLENIHSNC  
**401** **HGPISMDFAI** SKLKAGNQT GLYVLRCSKP DFNKYFLTFA VERENVIEYK  
**451** **HCLITKNENG** EYNLSGTRKN FSNLKDLLNC YQMETVRSDS IIFQFTKCCP  
**501** **PKPKDKSNLL** VFRTNGISDV QISPTLQRHN NVNQMVFHKI RNEDLIFNES  
**551** **LGQGTFTKIF** KGVREVGDY GQLHKTEVLL KVLDAHRNY SESFFEAASM  
**601** **MSQLSHKHLV** LNYGVCVCGE ENILVQEFVK FGSLDTYLKK NKNSINILWK  
**651** **LGVAQLAWA** MHFLEEKSLI HGNVCAKNIL LIREEDRRTG NPPFIKLSDP  
**701** **GISITVLPKD** ILQERIPWVP PECIENPKNL NLATDKWSFG TTLWEICSGG  
**751** **DKPLSALDSQ** RKLQFYEDKH QLPAPKWTEL ANLINNCMDY EPDFRPAFRA  
**801** **VIRDLNSLFT** PDYELLTEND MLPNMRIGAL GFSGAFEDRD PTQFEERHLK  
**851** **FLQQLGKGNF** GSVEMCRYDP LQDNTGEVVA VKKLQHSTEE HLRDFEREIE  
**901** **ILKSLQHDNI** VKYKGVCSYA GRRNLRLIME YLPYGSLRDY LQKHKERIDH  
**951** **KKLLQYTSQI** CKGMEYLGTK RYIHRDLATR NILVENENRV KIGDFGLTKV  
**1001** **LPQDKEYYKV** KEPGESPIFW YAPESLTESK FSVASDVWSF GVVLYELFTY  
**1051** **IEKSKSPPVE** FMRMIGNDKQ GQMIVFHLIE LLKSNGRLPR PEGCPDEIYV  
**1101** **IMTECWNNNV** SQRPSFRDLS LRVDQIRDSI AA

Figure S1 JAK2 protein was well identified with 85% sequence coverage.



MS/MS Fragmentation of **QANQECSNESR**Found in **G5E852**, Tyrosine-protein kinase OS=Mus musculus GN=Jak2 PE=1 SV=1

Match to Query 7546: 1512.650608 from(757.332580,2+) intensity(633753.4375)

Title: File20882 Spectrum6100 scans: 7377

Data file TEST\_151221212047.mgf

Click mouse within plot area to zoom in by factor of two about that point

Or,  200  1500 Da Label all possible matches ☐ Label matches used for scoring ☒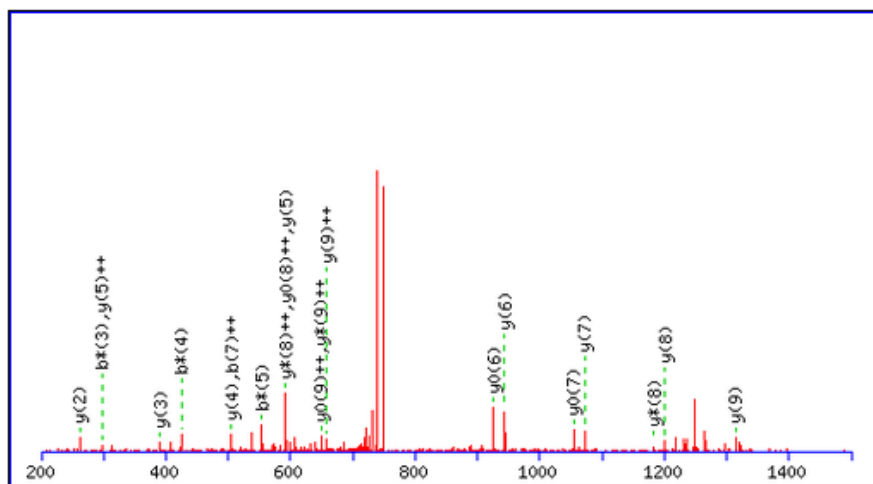**Monoisotopic mass of neutral peptide Mr(calc):** 1512.6514**Variable modifications:****C6** : PN (C)**Ions Score:** 52 **Expect:** 9e-005**Matches** : 21/110 fragment ions using 25 most intense peaks ([help](#))

| #  | b         | b <sup>++</sup> | b <sup>*</sup> | b <sup>+++</sup> | b <sup>0</sup> | b <sup>0++</sup> | Seq. | y         | y <sup>++</sup> | y <sup>*</sup> | y <sup>+++</sup> | y <sup>0</sup> | y <sup>0++</sup> | #  |
|----|-----------|-----------------|----------------|------------------|----------------|------------------|------|-----------|-----------------|----------------|------------------|----------------|------------------|----|
| 1  | 129.0659  | 65.0366         | 112.0393       | 56.5233          |                |                  | Q    |           |                 |                |                  |                |                  | 11 |
| 2  | 200.1030  | 100.5551        | 183.0764       | 92.0418          |                |                  | A    | 1385.6002 | 693.3037        | 1368.5736      | 684.7904         | 1367.5896      | 684.2984         | 10 |
| 3  | 314.1459  | 157.5766        | 297.1193       | 149.0633         |                |                  | N    | 1314.5631 | 657.7852        | 1297.5365      | 649.2719         | 1296.5525      | 648.7799         | 9  |
| 4  | 442.2045  | 221.6059        | 425.1779       | 213.0926         |                |                  | Q    | 1200.5201 | 600.7637        | 1183.4936      | 592.2504         | 1182.5096      | 591.7584         | 8  |
| 5  | 571.2471  | 286.1272        | 554.2205       | 277.6139         | 553.2365       | 277.1219         | E    | 1072.4616 | 536.7344        | 1055.4350      | 528.2211         | 1054.4510      | 527.7291         | 7  |
| 6  | 922.3975  | 461.7024        | 905.3709       | 453.1891         | 904.3869       | 452.6971         | C    | 943.4190  | 472.2131        | 926.3924       | 463.6998         | 925.4084       | 463.2078         | 6  |
| 7  | 1009.4295 | 505.2184        | 992.4030       | 496.7051         | 991.4190       | 496.2131         | S    | 592.2685  | 296.6379        | 575.2420       | 288.1246         | 574.2580       | 287.6326         | 5  |
| 8  | 1123.4725 | 562.2399        | 1106.4459      | 553.7266         | 1105.4619      | 553.2346         | N    | 505.2365  | 253.1219        | 488.2100       | 244.6086         | 487.2259       | 244.1166         | 4  |
| 9  | 1252.5150 | 626.7612        | 1235.4885      | 618.2479         | 1234.5045      | 617.7559         | E    | 391.1936  | 196.1004        | 374.1670       | 187.5871         | 373.1830       | 187.0951         | 3  |
| 10 | 1339.5471 | 670.2772        | 1322.5205      | 661.7639         | 1321.5365      | 661.2719         | S    | 262.1510  | 131.5791        | 245.1244       | 123.0659         | 244.1404       | 122.5738         | 2  |
| 11 |           |                 |                |                  |                |                  | R    | 175.1190  | 88.0631         | 158.0924       | 79.5498          |                |                  | 1  |

Figure S3 Cys335 of mouse JAK2 protein was covalently modified by parthenolide.

MS/MS Fragmentation of **DLLNCYQMETVR**Found in **G5E852**, Tyrosine-protein kinase OS=Mus musculus GN=Jak2 PE=1 SV=1

Match to Query 9298: 1747.818088 from(874.916320,2+) intensity(46608.8789)

Title: File20882 Spectrum11135 scans: 13419

Data file TEST\_151221212047.mgf

Click mouse within plot area to zoom in by factor of two about that point

Or,  200  1700 Da Label all possible matches ☐ Label matches used for scoring ☒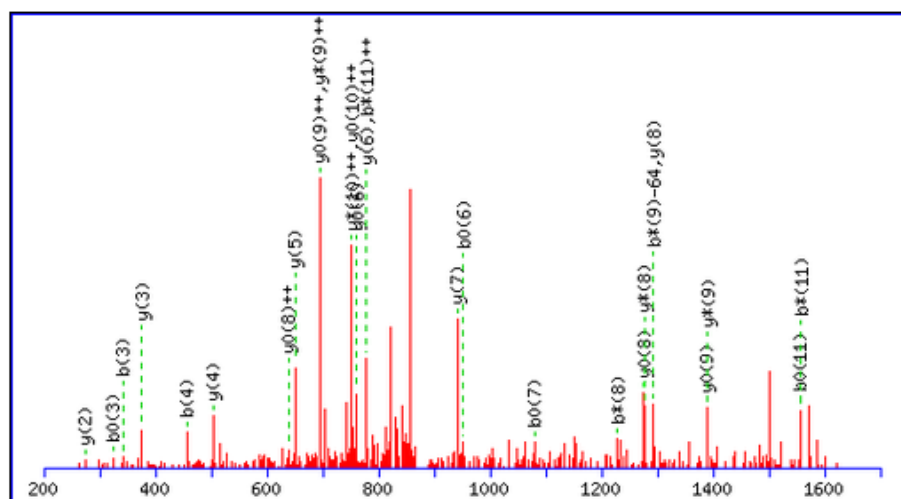Monoisotopic mass of neutral peptide  $M_r(\text{calc})$ : 1747.8161

Variable modifications:

**C5** : PN (C)**M8** : Oxidation (M), with neutral losses 0.0000(shown in table), 63.9983

Ions Score: 34 Expect: 0.022

Matches : 27/188 fragment ions using 42 most intense peaks ([help](#))

| #  | b               | b <sup>++</sup> | b <sup>*</sup>   | b <sup>***</sup> | b <sup>0</sup>   | b <sup>0++</sup> | Seq. | y                | y <sup>++</sup> | y <sup>*</sup>   | y <sup>***</sup> | y <sup>0</sup>   | y <sup>0++</sup> | #  |
|----|-----------------|-----------------|------------------|------------------|------------------|------------------|------|------------------|-----------------|------------------|------------------|------------------|------------------|----|
| 1  | 116.0342        | 58.5207         |                  |                  | 98.0237          | 49.5155          | D    |                  |                 |                  |                  |                  |                  | 12 |
| 2  | 229.1183        | 115.0628        |                  |                  | 211.1077         | 106.0575         | L    | 1633.7964        | 817.4019        | 1616.7699        | 808.8886         | 1615.7859        | 808.3966         | 11 |
| 3  | <b>342.2023</b> | 171.6048        |                  |                  | <b>324.1918</b>  | 162.5995         | L    | 1520.7124        | 760.8598        | 1503.6858        | <b>752.3465</b>  | 1502.7018        | <b>751.8545</b>  | 10 |
| 4  | <b>456.2453</b> | 228.6263        | 439.2187         | 220.1130         | 438.2347         | 219.6210         | N    | 1407.6283        | 704.3178        | <b>1390.6018</b> | <b>695.8045</b>  | <b>1389.6177</b> | <b>695.3125</b>  | 9  |
| 5  | 807.3957        | 404.2015        | 790.3692         | 395.6882         | 789.3851         | 395.1962         | C    | <b>1293.5854</b> | 647.2963        | <b>1276.5588</b> | 638.7831         | <b>1275.5748</b> | <b>638.2910</b>  | 8  |
| 6  | 970.4590        | 485.7332        | 953.4325         | 477.2199         | <b>952.4485</b>  | 476.7279         | Y    | <b>942.4349</b>  | 471.7211        | 925.4084         | 463.2078         | 924.4244         | 462.7158         | 7  |
| 7  | 1098.5176       | 549.7624        | 1081.4911        | 541.2492         | <b>1080.5070</b> | 540.7572         | Q    | <b>779.3716</b>  | 390.1894        | 762.3451         | 381.6762         | <b>761.3611</b>  | 381.1842         | 6  |
| 8  | 1245.5530       | 623.2801        | <b>1228.5265</b> | 614.7669         | 1227.5424        | 614.2749         | M    | <b>651.3130</b>  | 326.1602        | 634.2865         | 317.6469         | 633.3025         | 317.1549         | 5  |
| 9  | 1374.5956       | 687.8014        | 1357.5691        | 679.2882         | 1356.5850        | 678.7962         | E    | <b>504.2776</b>  | 252.6425        | 487.2511         | 244.1292         | 486.2671         | 243.6372         | 4  |
| 10 | 1475.6433       | 738.3253        | 1458.6167        | 729.8120         | 1457.6327        | 729.3200         | T    | <b>375.2350</b>  | 188.1212        | 358.2085         | 179.6079         | 357.2245         | 179.1159         | 3  |
| 11 | 1574.7117       | 787.8595        | <b>1557.6851</b> | <b>779.3462</b>  | <b>1556.7011</b> | 778.8542         | V    | <b>274.1874</b>  | 137.5973        | 257.1608         | 129.0840         |                  |                  | 2  |
| 12 |                 |                 |                  |                  |                  |                  | R    | 175.1190         | 88.0631         | 158.0924         | 79.5498          |                  |                  | 1  |

Figure S4 Cys480 of mouse JAK2 protein was covalently modified by parthenolide.
